# Supplementary material for: Conservation and Losses of Non-Coding RNAs in Avian Genomes
Source: PubMed Central journal article supplement (PMC4378963; doi:10.1371/journal.pone.0121797), 2015-03-30
Supplement: pone.0121797.s001.pdf [file pone.0121797.s001.pdf]

# Supplementary material for: Conservation and losses of non-coding RNAs in avian genomes

Paul P. Gardner<sup>\*1,2</sup> , Mario Fasold<sup>3,4</sup> , Sarah W. Burge<sup>5</sup> , Maria Ninova<sup>6</sup> , Jana Hertel<sup>3</sup> , Stephanie Kehr<sup>3</sup> , Tammy E. Steeves<sup>1</sup> , Sam Griffiths-Jones<sup>6</sup> and Peter F. Stadler<sup>3,7-11</sup>

<sup>1</sup> School of Biological Sciences, University of Canterbury, Private Bag 4800, Christchurch, New Zealand. <sup>2</sup> Biomolecular Interaction Centre, University of Canterbury, Private Bag 4800, Christchurch, New Zealand. <sup>3</sup> Bioinformatics Group, Department of Computer Science; and Interdisciplinary Center for Bioinformatics, University of Leipzig, Härtelstrasse 16-18, D-04107 Leipzig, Germany. <sup>4</sup> ecSeq Bioinformatics, Brandvorwerkstr.43, D-04275 Leipzig, Germany. <sup>5</sup> European Molecular Biology Laboratory, European Bioinformatics Institute, Hinxton, Cambridge, CB10 1SD, UK. <sup>6</sup> Faculty of Life Sciences, University of Manchester, Manchester, United Kingdom. <sup>7</sup> Max Planck Institute for Mathematics in the Sciences, Inselstraße 22, D-04103 Leipzig, Germany. <sup>8</sup> Fraunhofer Institute for Cell Therapy and Immunology, Perlickstrasse 1, D-04103 Leipzig, Germany. <sup>9</sup> Department of Theoretical Chemistry of the University of Vienna, Währingerstrasse 17, A-1090 Vienna. <sup>10</sup> Center for RNA in Technology and Health, Univ. Copenhagen, Grønnegårdsvej 3, Frederiksberg C, Denmark. <sup>11</sup> Santa Fe Institute, 1399 Hyde Park Road, Santa Fe NM 87501, USA. <sup>10</sup> German Centre for Integrative Biodiversity Research (iDiv) Halle-Jena-Leipzig.

Email: Paul P. Gardner\* - paul.gardner@canterbury.ac.nz; mario@bioinf.uni-leipzig.de; swb@ebi.ac.uk; Maria.Ninova@postgrad.manchester.ac.uk; jana@bioinf.uni-leipzig.de; steffi@bioinf.uni-leipzig.de; tammy.steeves@canterbury.ac.nz; sam.griffiths-jones@manchester.ac.uk; studla@bioinf.uni-leipzig.de;

\*To whom correspondence should be addressed

## Supplementary results

In the following we explore in further detail the results that were not discussed in the main manuscript.

### Unexpectedly poorly conserved ncRNAs: testing divergence

In order to get an idea to what extent the absence of these RNAs from the **infernal-based** annotation is caused by sequence divergence beyond the thresholds of the Rfam CMs and/or missing or incomplete data, we complemented our analysis by dedicated searches for a few of these RNA groups.

The simplest case are the selenocysteine tRNAs. Here, tRNAscan is tuned for specificity and thus misses several occurrences that are easily found by **blastn** with  $E \leq 10^{-30}$ . In some cases the sequences appear degraded at the ends, which may be explained e.g. by low sequence quality at the very ends of contigs or scaffolds. A **blastn** search also readily retrieves additional RNase P and RNase MRP RNAs, capturing only the best conserved regions. In many cases these additional candidates are incomplete or contain undetermined sequence, explaining why they are missed by the CMs. Overall, we identify tRNA-Sec in

most and RNase P and MRP RNAs in the majority of the genomes. An additional candidate could also be retrieved for telomerase RNA. Telomerase is well known to exhibit very poor sequence conservation and rapid variations in size that make it notoriously hard to identify by homology search [1]. The poor return thus does not come as a surprise. Vault RNA homology searches with `blastn` remained unsuccessful, therefore we constructed a sauropsid-specific CM. In addition to the hits identified by the Rfam model we obtained three additional homologs. Vault RNAs, with a size of about 100 nt, exhibit conserved sequence patterns only at their ends, with essentially unconstrained sequence in the central part. Their identification is one of the well-known and difficult problems for homology search [2, 3].

Our ability to find additional homologs for several RNA families that fill gaps in the abundance matrices (Figure A) strongly suggests that conspicuous absences, in particular of LUCA and LECA RNAs, are caused by incomplete data in the current assemblies and sequence divergence rather than true losses.

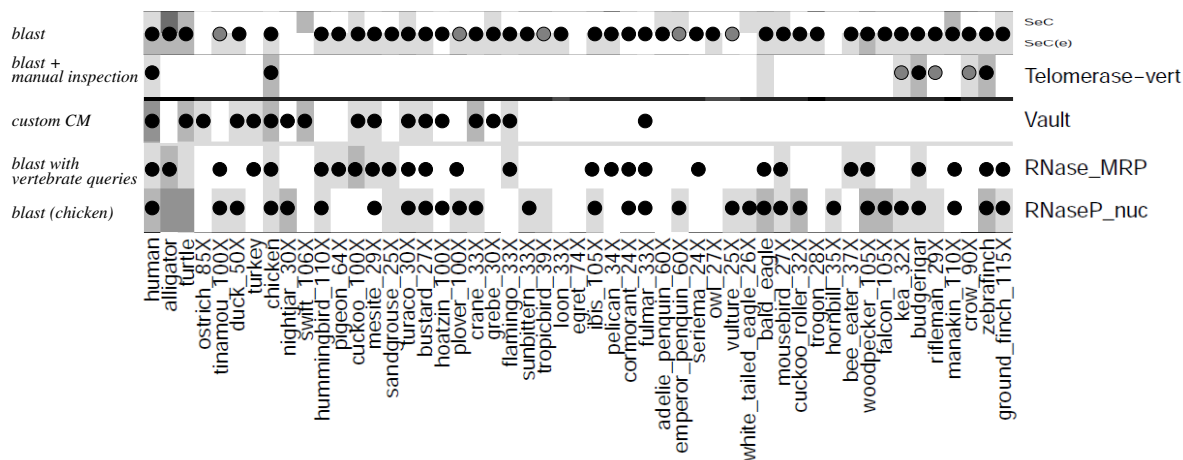

Figure A: Additional homologs of some sparsely represented RNA families were discovered using dedicated search strategies combined with highly sensitive settings, synteny information, lineage-specific CMs and subsequent manual inspection.

### Exceptional RNAs

A number of other ncRNAs can also be found in Eukaryotic genomes. These do not fit into the main classes of RNA but still perform vital roles in the function and evolution of Eukaryotes. Their functions are diverse and many have not yet been characterised.

An example of an uncharacterised RNA is the ultraconserved element, uc.338 (also known as TUC338) [4–6]. The uc.338 element is derived from a short interspersed element (SINE) called the lobe-finned fishes SINE (LF-SINE) as it is conserved between the coelacanth and mammals [5]. Analysis of

the expression of uc.338 implies that it plays a role in the progression of hepatocellular carcinoma, possibly by influencing cell growth [6]. This RNA is conserved in the birds and appears to have been duplicated in several lineages.

The Y RNA is an enigmatic ncRNA where we know very little about the function. It was discovered in the 1980s in ribonucleoprotein complexes [7]. The function of the Y RNAs remain unknown, but evidence is emerging that they may be associated with DNA replication [8]. There are 4 functional Y RNAs encoded in the human genome, Y1, Y3, Y4 and Y5. However, there are hundreds of pseudogenised copies of the Y RNA scattered throughout the human genome [9]. In the birds and other lizards, we identify between two and seven Y RNA paralogs (See Figure B).

The Vault RNA forms a major component of the vault ribonucleoprotein complex, this is one of the largest particles found in the vertebrate cell; In fact, it is larger than the ribosome [10]. As yet not much is known about the function of Vault. The Vault RNA has been shown to be broadly conserved in metazoans [11]. However, in the bird lineages it appears to have either been lost or diversified.

### **Contamination**

Bacterial families can be used to identify problematic sequences that are likely to be the result of contamination from non-avian sources. We identified a number of RNA families of bacterial origin in the avian genomes. These have been reported and will be dealt with in later updates to the avian genome sequences. Contamination partially explains the large number of low numbers of some families, high-evolutionary turnover explains most of the remainder (See Supplementary Figure O) [12–14].





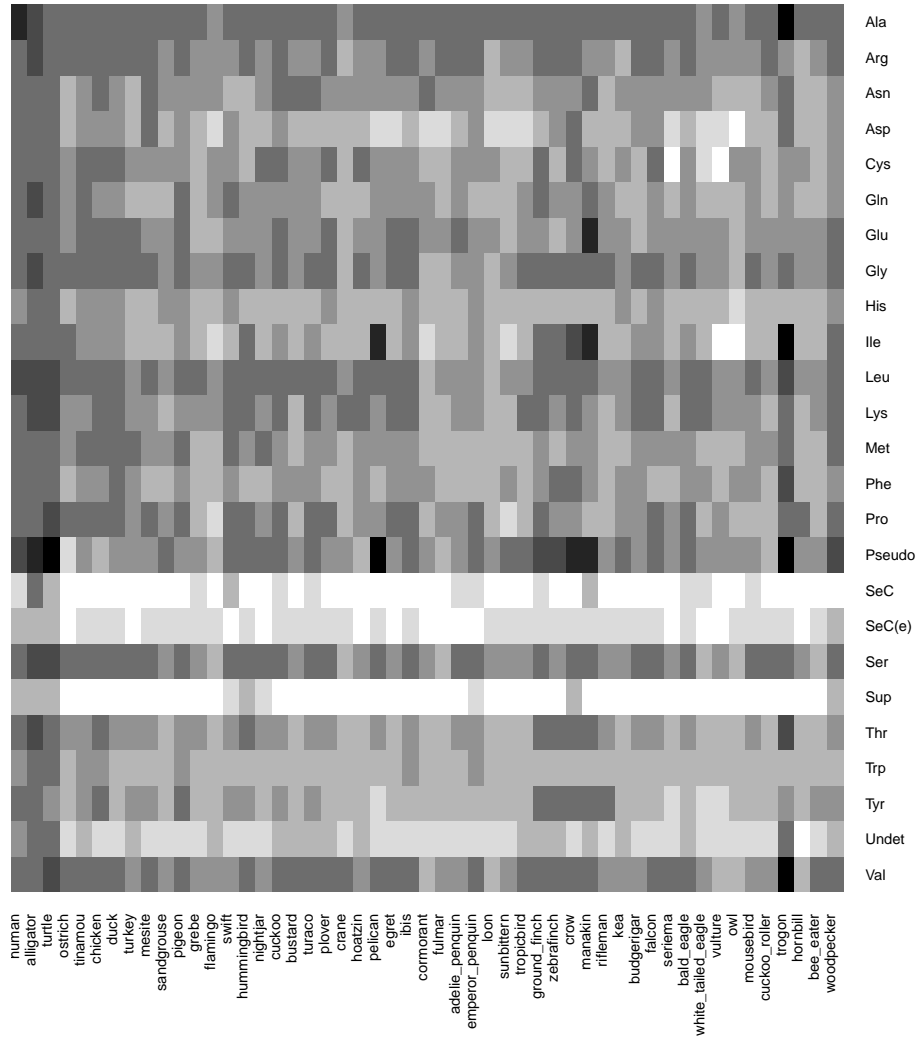

Figure D: Heatmaps showing the presence/absence and approximate copy number of **tRNA** families.

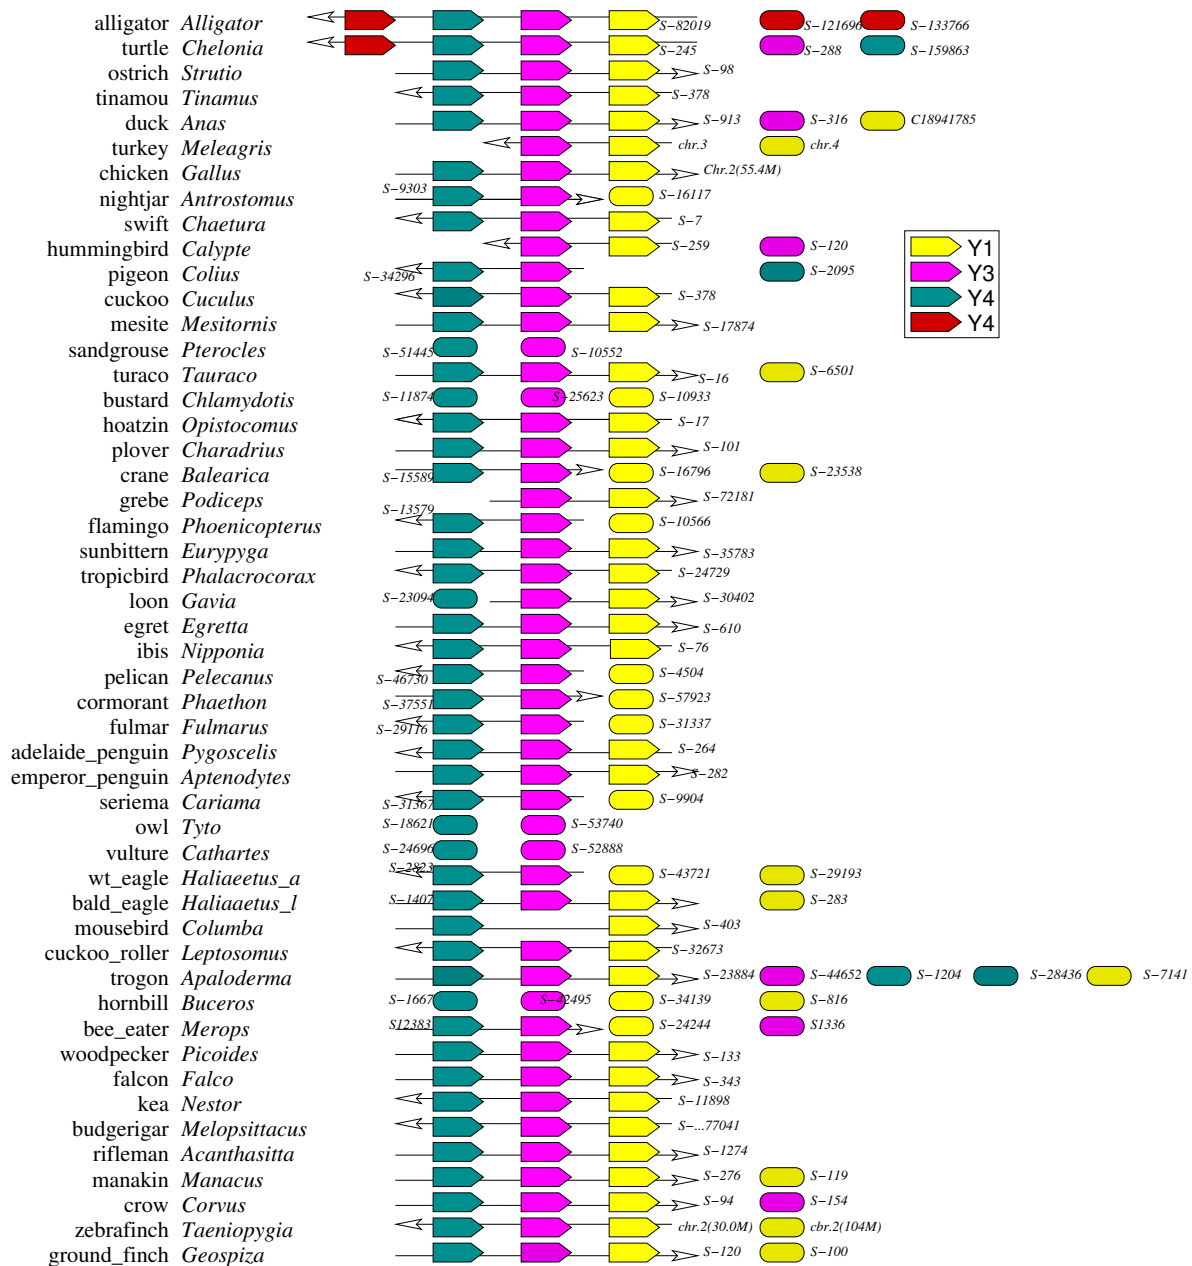

Figure E: Syntenic conservation of the Y RNA cluster in avian and reptile genomes.







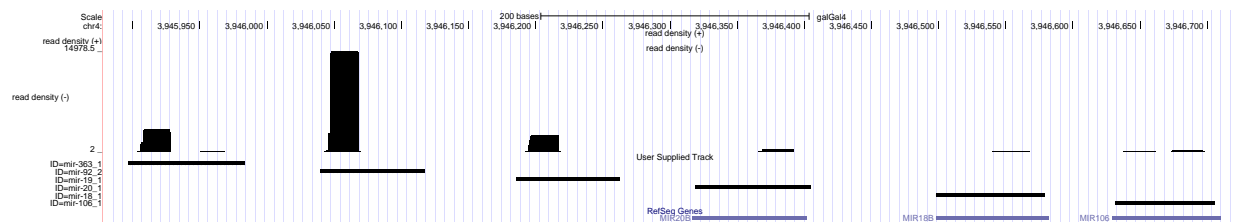

Figure I: microRNA 17 I-X cluster: mir-363.1, mir-92.2, mir-19.1, mir-20.1, mir-18.1, mir-106.1. The figure indicates the genomic location and the RNA-seq read-depths for these 6 microRNAs.

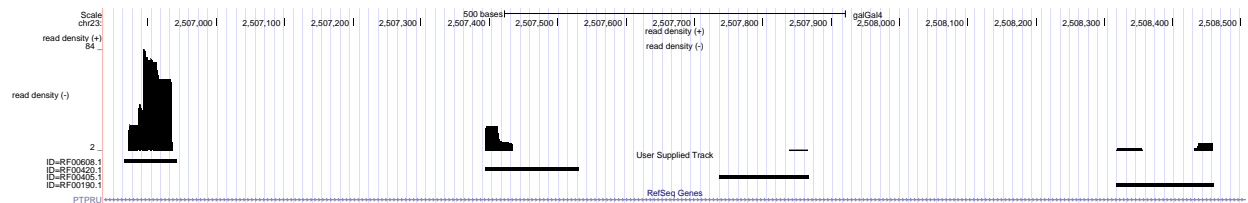

Figure J: H/ACA box snoRNA cluster: SNORA61, SNORA44, SNORA16. The figure indicates the genomic location and the RNA-seq read-depths for these 3 snoRNAs.

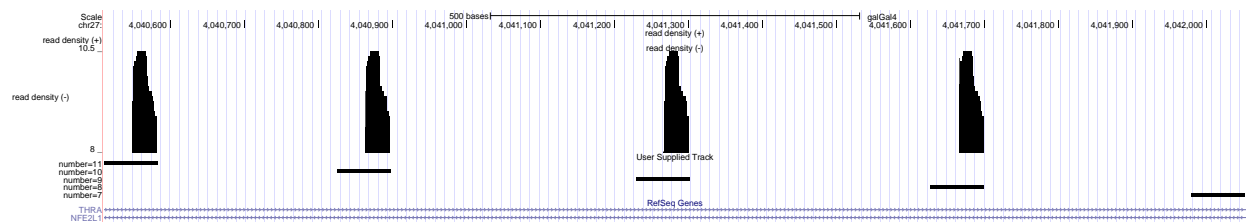

Figure K: Cysteine tRNA cluster. The figure indicates the genomic location and the RNA-seq read-depths for these 5 transfer RNAs.



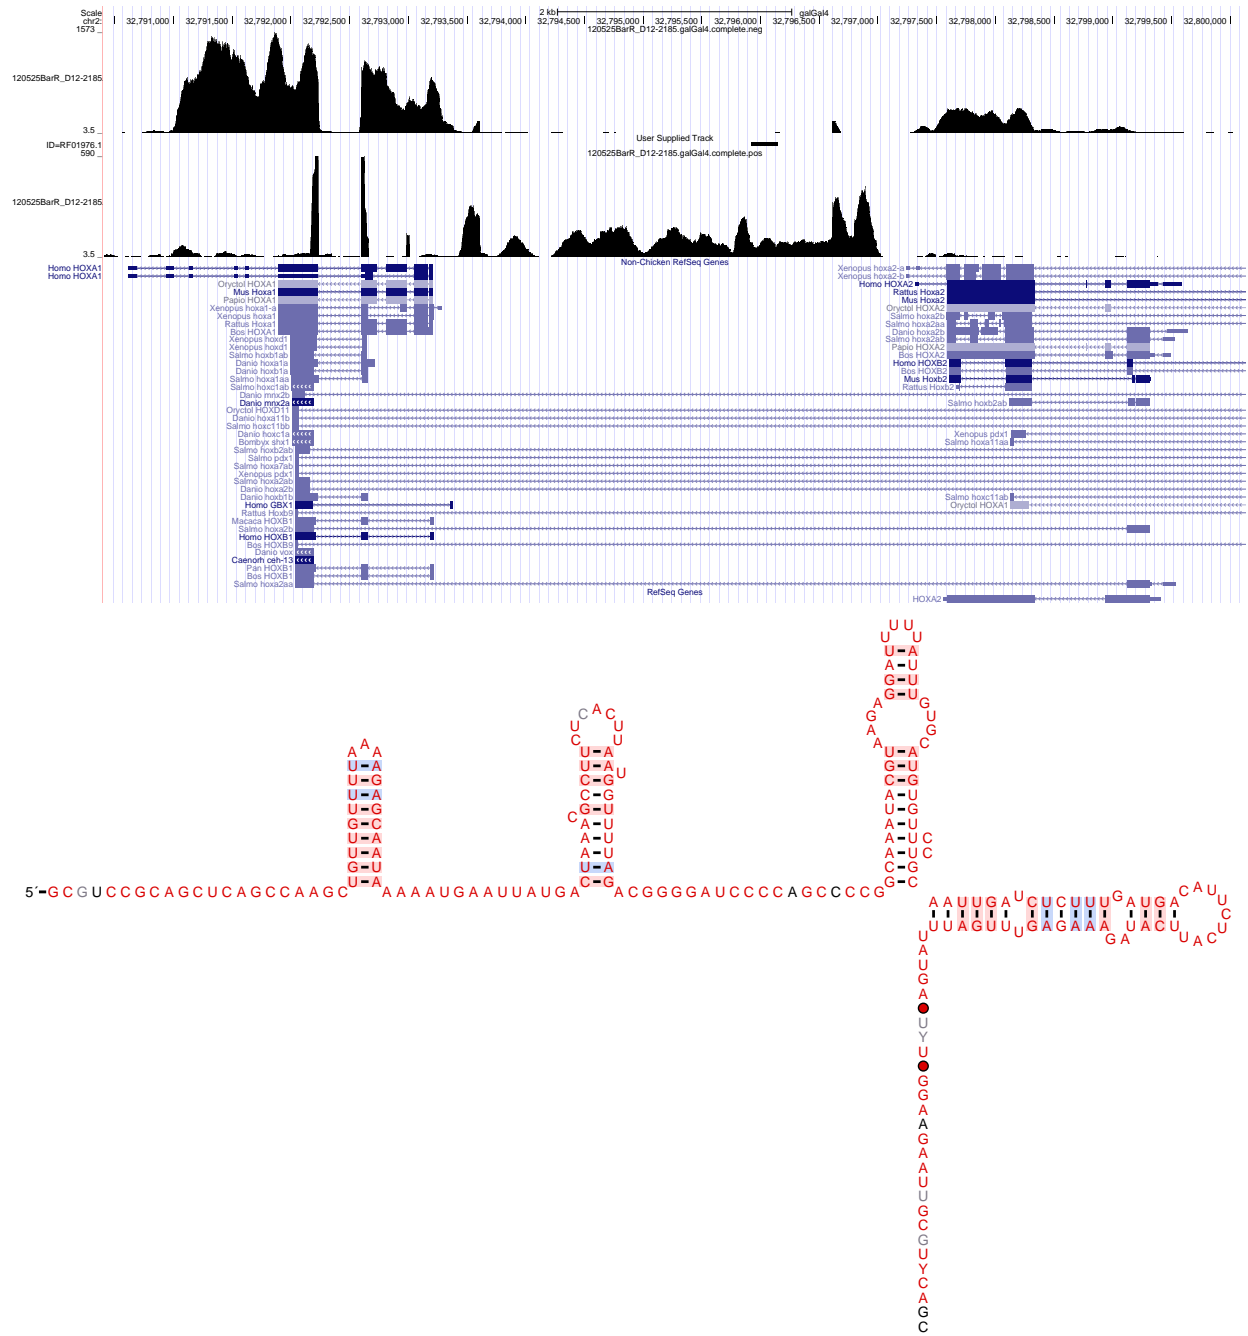

Figure M: Above: Expression of the chicken HOTAIRM1 (RF01976) locus and the surrounding genes: HOXA1, HOXA2, and HOXA3. Below: The predicted secondary structure of the Avian HOTAIRM1 domain.

| RNA family (Rfam ID)      | Chromosome | Coordinates       | Strand |
|---------------------------|------------|-------------------|--------|
| <b>Macro-chromosomes:</b> |            |                   |        |
| RNase MRP (RF00030)       | chr4       | 39276202-39276488 | -      |
| <b>Micro-chromosomes:</b> |            |                   |        |
| U4atac snRNA (RF00618)    | chr7       | 25702714-25702831 | +      |
| RNase P RNA (RF00009)     | chr8       | 6609347-6609668   | -      |
| Telomerase RNA (RF00024)  | chr9       | 19429028-19429084 | +      |
| Vault RNA (RF00006)       | chr13      | 380747-380840     | +      |
| U11 snRNA (RF00548)       | chr23      | 2216932-2217058   | -      |

Table A: The location of “missing” RNA families in the chicken genome (galGal4).

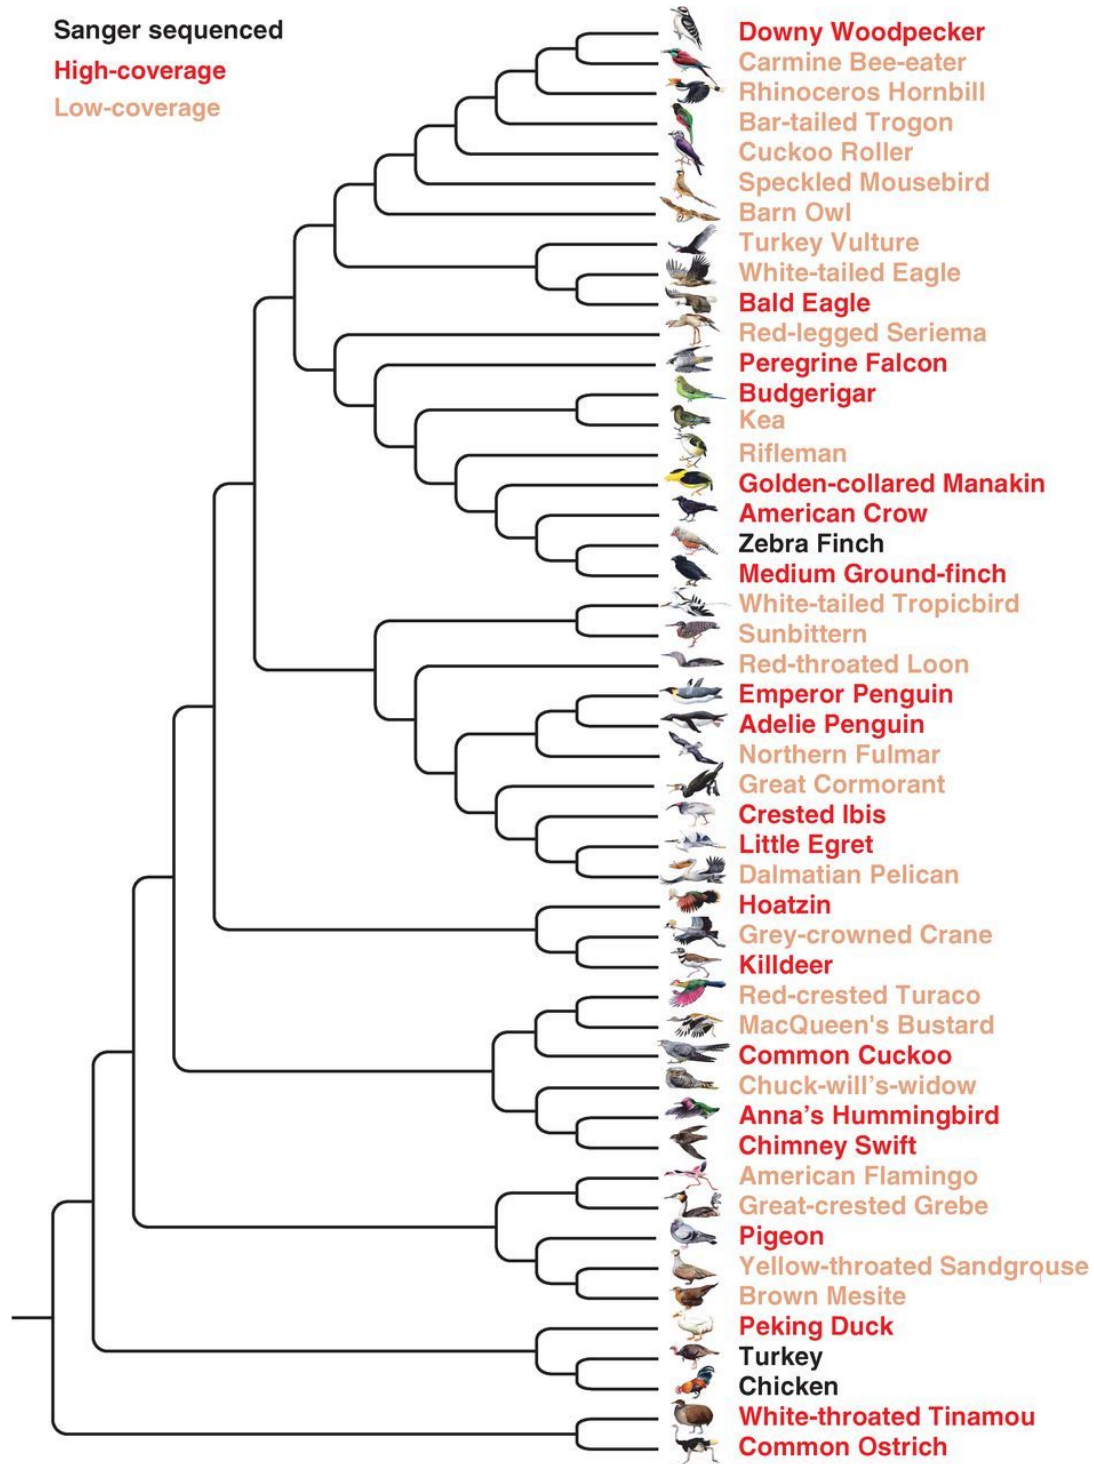

Figure N: The phylogenetic relationships between the Avian species used in this study. This figure has been reproduced, with permission from [15].

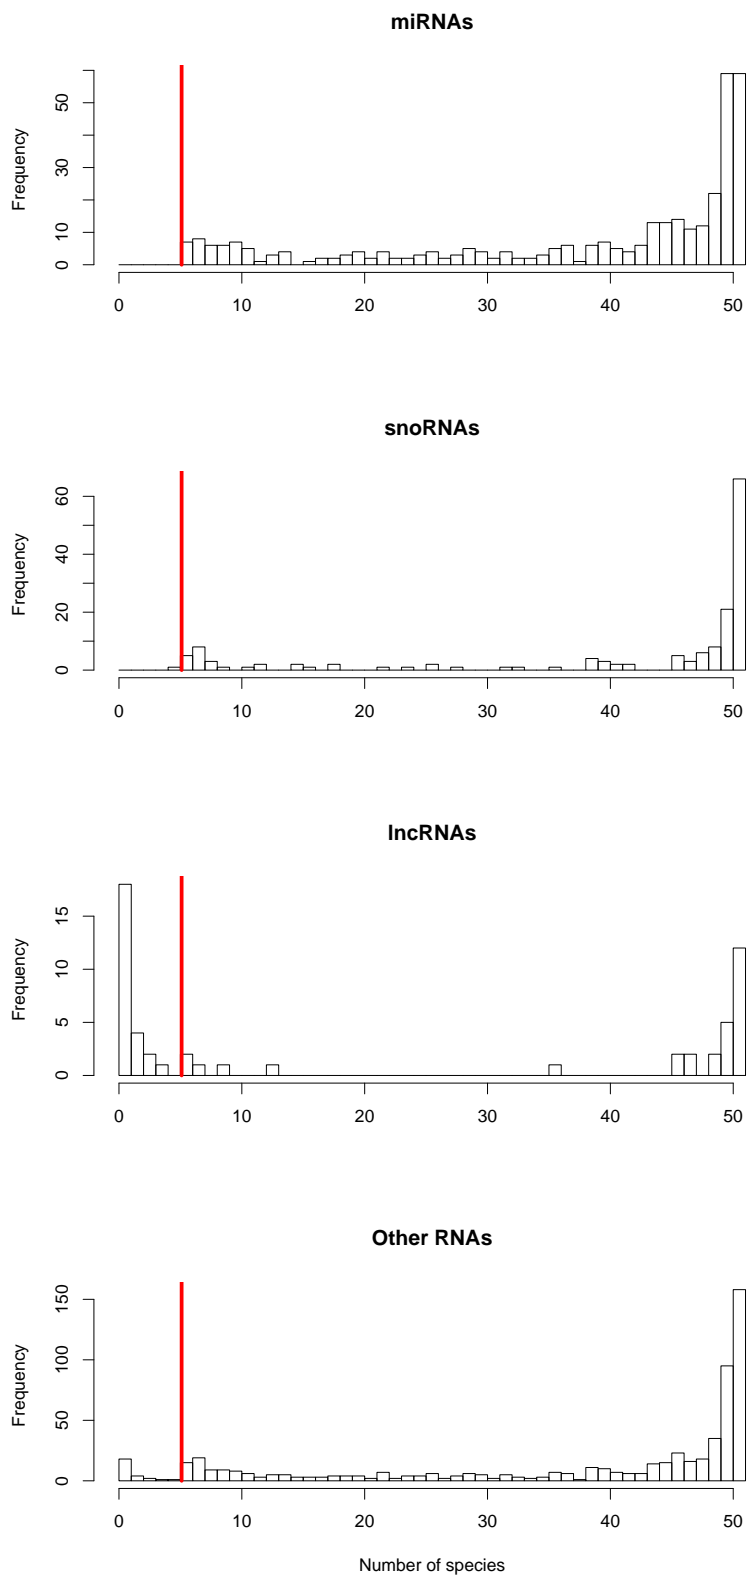

Figure O: The distribution of species counts for RNA families.

## Database accessions

The NCBI BioProject, SRA and Study IDs for the genomes used in this study are listed below.

| Name                | Species                         | BioProject ID | SRA ID    | Study ID  |
|---------------------|---------------------------------|---------------|-----------|-----------|
| Chimney Swift       | <i>Chaetura pelagica</i>        | PRJNA210808   | SRA092327 | SRP026688 |
| Hummingbird         | <i>Calypte anna</i>             | PRJNA212866   | SRA096094 | SRP028275 |
| Plover              | <i>Charadrius vociferus</i>     | PRJNA212867   | SRA096158 | SRP028286 |
| Crow                | <i>Corvus brachyrhynchos</i>    | PRJNA212869   | SRA096200 | SRP028317 |
| Cuckoo              | <i>Cuculus canorus</i>          | PRJNA212870   | SRA096365 | SRP028349 |
| Manakin             | <i>Manacus vitellinus</i>       | PRJNA212872   | SRA096507 | SRP028393 |
| Hoatzin             | <i>Ophisthocomus hoazin</i>     | PRJNA212873   | SRA096539 | SRP028409 |
| Woodpecker          | <i>Picoides pubescens</i>       | PRJNA212874   | SRA097131 | SRP028625 |
| Ostrich             | <i>Struthio camelus</i>         | PRJNA212875   | SRA097407 | SRP028745 |
| Tinamou             | <i>Tinamus guttatus</i>         | PRJNA212876   | SRA097796 | SRP028753 |
| Rifleman            | <i>Acanthisitta chloris</i>     | PRJNA212877   | SRA097960 | SRP028832 |
| Trogon              | <i>Apaloderma vittatum</i>      | PRJNA212878   | SRA097967 | SRP028834 |
| Crane               | <i>Balearica regulorum</i>      | PRJNA212879   | SRA097970 | SRP028839 |
| Rhinoceros Hornbill | <i>Buceros rhinoceros</i>       | PRJNA212887   | SRA097991 | SRP028845 |
| Nightjar            | <i>Antrostomus carolinensis</i> | PRJNA212888   | SRA098079 | SRP028883 |
| Seriema             | <i>Cariama cristata</i>         | PRJNA212889   | SRA098089 | SRP028884 |
| Turkey Vulture      | <i>Cathartes aura</i>           | PRJNA212890   | SRA098145 | SRP028913 |
| Bustard             | <i>Chlamydotis macqueenii</i>   | PRJNA212891   | SRA098203 | SRP028950 |
| Mousebird           | <i>Colius striatus</i>          | PRJNA212892   | SRA098342 | SRP028965 |
| Sunbittern          | <i>Eurypyga helias</i>          | PRJNA212893   | SRA098749 | SRP029147 |
| Northern Fulmar     | <i>Fulmarus glacialis</i>       | PRJNA212894   | SRA098806 | SRP029180 |
| Red-throated Loon   | <i>Gavia stellata</i>           | PRJNA212895   | SRA098829 | SRP029187 |
| White-tailed Eagle  | <i>Haliaeetus albicilla</i>     | PRJNA212896   | SRA098868 | SRP029203 |
| Bald Eagle          | <i>Haliaeetus leucocephalus</i> | PRJNA237821   | SRX475899 | SRP038924 |
|                     |                                 | SRX475900     |           |           |
|                     |                                 | SRX475901     |           |           |
|                     |                                 | SRX475902     |           |           |
| Cuckoo Roller       | <i>Leptosomus discolor</i>      | PRJNA212897   | SRA098894 | SRP029206 |
| Bee-eater           | <i>Merops nubicus</i>           | PRJNA212898   | SRA099305 | SRP029278 |
| Brown Mesite        | <i>Mesitornis unicolor</i>      | PRJNA212899   | SRA099409 | SRP029309 |
| Kea                 | <i>Nestor notabilis</i>         | PRJNA212900   | SRA099410 | SRP029311 |
| Pelican             | <i>Pelecanus crispus</i>        | PRJNA212901   | SRA099411 | SRP029331 |
| Tropicbird          | <i>Phaethon lepturus</i>        | PRJNA212902   | SRA099412 | SRP029342 |
| Cormorant           | <i>Phalacrocorax carbo</i>      | PRJNA212903   | SRA099413 | SRP029344 |
| Flamingo            | <i>Phoenicopterus ruber</i>     | PRJNA212904   | SRA099414 | SRP029345 |
| Grebe               | <i>Podiceps cristatus</i>       | PRJNA212905   | SRA099415 | SRP029346 |
| Sandgrouse          | <i>Pterocles gutturalis</i>     | PRJNA212906   | SRA099416 | SRP029347 |
| Turaco              | <i>Tauraco erythrolophus</i>    | PRJNA212908   | SRA099418 | SRP029348 |
| Barn Owl            | <i>Tyto alba</i>                | PRJNA212909   | SRA099419 | SRP029349 |
| Crested Ibis        | <i>Nipponia nippon</i>          | PRJNA232572   | SRA122361 | SRP035852 |
| Little Egret        | <i>Egretta garzetta</i>         | PRJNA232959   | SRA123137 | SRP035853 |

Table B: The NCBI BioProject/SRA and Study IDs used in this study.



| Common name         | Species                           | BioProject ID | SRA ID    | Study ID            |
|---------------------|-----------------------------------|---------------|-----------|---------------------|
| Emperor Penguin     | <i>Aptenodytes forsteri</i>       | PRJNA235982   | SRA129317 | SRP035855           |
| Adelie Penguin      | <i>Pygoscelis adeliae</i>         | PRJNA235983   | SRA129318 | SRP035856           |
| Chicken             | <i>Gallus gallus</i>              | PRJNA13342    | SRA030184 | SRP005856 (galGal4) |
| Zebra Finch         | <i>Taeniopygia guttata</i>        | PRJNA17289    | SRA010067 | SRP001389           |
| Turkey              | <i>Meleagris gallopavo</i>        | PRJNA42129    | Unknown   | Unknown             |
| Budgerigar          | <i>Melopsittacus undulatus</i>    | PRJEB1588     | ERA200248 | ERP002324           |
| Mallard             | <i>Anas platyrhynchos</i>         | PRJNA46621    | SRA010308 | SRP001571           |
| Rock Pigeon         | <i>Columba livia</i>              | PRJNA167554   | SRA054954 | SRP013894           |
| Peregrine Falcon    | <i>Falco peregrinus</i>           | PRJNA159791   | SRA055082 | SRP013939           |
| Medium Ground-finch | <i>Geospiza fortis</i>            | PRJNA156703   | SRA051234 | SRP011940           |
| Outgroups           |                                   |               |           |                     |
| Human               | <i>Homo sapiens</i>               |               |           | HG19/GRCh37         |
| Alligator           | <i>Alligator mississippiensis</i> |               |           | allMis1             |
| Green Turtle        | <i>Chelonia mydas</i>             | PRJNA104937   |           |                     |
| RNA-seq data        |                                   |               |           |                     |
| Chicken             | <i>Gallus gallus</i>              | PRJNA204941   | NA        | NA                  |
| Chicken             | <i>Gallus gallus</i>              | NA            | NA        | SRP041863           |

Table C: The NCBI BioProject/SRA and Study IDs for the previously published genomes used in this study.

## References

- Xie M, Mosig A, Qi X, Li Y, Stadler PF, Chen JJJ: **Size Variation and Structural Conservation of Vertebrate Telomerase RNA.** *J. Biol. Chem.* 2008, **283**:2049–2059.
- Stadler PF, Chen JJJ, Hackermüller J, Hoffmann S, Horn F, Khaitovich P, Kretzschmar AK, Mosig A, Prohaska SJ, Qi X, Schutt K, Ullmann K: **Evolution of Vault RNAs.** *Mol. Biol. Evol.* 2009, **26**:1975–1991.
- Kolbe DL, Eddy SR: **Local RNA structure alignment with incomplete sequence.** *Bioinformatics* 2009, **25**(10):1236–43.
- Bejerano G, Pheasant M, Makunin I, Stephen S, Kent WJ, Mattick JS, Haussler D: **Ultraconserved elements in the human genome.** *Science* 2004, **304**(5675):1321–5.
- Bejerano G, Lowe CB, Ahituv N, King B, Siepel A, Salama SR, Rubin EM, Kent WJ, Haussler D: **A distal enhancer and an ultraconserved exon are derived from a novel retroposon.** *Nature* 2006, **441**(7089):87–90.
- Braconi C, Valeri N, Kogure T, Gasparini P, Huang N, Nuovo GJ, Terracciano L, Croce CM, Patel T: **Expression and functional role of a transcribed noncoding RNA with an ultraconserved element in hepatocellular carcinoma.** *Proc Natl Acad Sci U S A* 2011, **108**(2):786–91.
- Lerner MR, Boyle JA, Hardin JA, Steitz JA: **Two novel classes of small ribonucleoproteins detected by antibodies associated with lupus erythematosus.** *Science* 1981, **211**(4480):400–2.
- Christov CP, Gardiner TJ, Szüts D, Krude T: **Functional requirement of noncoding Y RNAs for human chromosomal DNA replication.** *Mol Cell Biol* 2006, **26**(18):6993–7004.
- Mosig A, Guofeng M, Stadler BM, Stadler PF: **Evolution of the vertebrate Y RNA cluster.** *Theory Biosci* 2007, **126**:9–14.
- Kong LB, Siva AC, Rome LH, Stewart PL: **Structure of the vault, a ubiquitous cellular component.** *Structure* 1999, **7**(4):371–9.
- Stadler PF, Chen JJ, Hackermüller J, Hoffmann S, Horn F, Khaitovich P, Kretzschmar AK, Mosig A, Prohaska SJ, Qi X, Schutt K, Ullmann K: **Evolution of vault RNAs.** *Mol Biol Evol* 2009, **26**(9):1975–91.
- Cabili MN, Trapnell C, Goff L, Koziol M, Tazon-Vega B, Regev A, Rinn JL: **Integrative annotation of human large intergenic noncoding RNAs reveals global properties and specific subclasses.** *Genes Dev* 2011, **25**(18):1915–27.

13. Kutter C, Watt S, Stefflova K, Wilson MD, Goncalves A, Ponting CP, Odom DT, Marques AC: **Rapid turnover of long noncoding RNAs and the evolution of gene expression.** *PLoS Genet* 2012, **8**(7):e1002841.
14. Hoepfner MP, Gardner PP, Poole AM: **Comparative analysis of RNA families reveals distinct repertoires for each domain of life.** *PLoS Comput Biol* 2012, **8**(11):e1002752.
15. Jarvis ED, Mirarab S, Aberer AJ, Li B, Houde P, Li C, Ho SYW, Faircloth BC, Nabholz B, Howard JT, Suh A, Weber CC, da Fonseca RR, Li J, Zhang F, Li H, Zhou L, Narula N, Liu L, Ganapathy G, Boussau B, Bayzid MS, Zavidovych V, Subramanian S, Gabaldón T, Capella-Gutiérrez S, Huerta-Cepas J, Rekepalli B, Munch K, Schierup M, Lindow B, Warren WC, Ray D, Green RE, Bruford MW, Zhan X, Dixon A, Li S, Li N, Huang Y, Derryberry EP, Bertelsen MF, Sheldon FH, Brumfield RT, Mello CV, Lovell PV, Wirthlin M, Schneider MPC, Prosdocimi F, Samaniego JA, Velazquez AMV, Alfaro-Núñez A, Campos PF, Petersen B, Sicheritz-Ponten T, Pas A, Bailey T, Scofield P, Bunce M, Lambert DM, Zhou Q, Perelman P, Driskell AC, Shapiro B, Xiong Z, Zeng Y, Liu S, Li Z, Liu B, Wu K, Xiao J, Yinqi X, Zheng Q, Zhang Y, Yang H, Wang J, Smeds L, Rheindt FE, Braun M, Fjeldsa J, Orlando L, Barker FK, Jönsson KA, Johnson W, Koepfli KP, O'Brien S, Haussler D, Ryder OA, Rahbek C, Willerslev E, Graves GR, Glenn TC, McCormack J, Burt D, Ellegren H, Alström P, Edwards SV, Stamatakis A, Mindell DP, Cracraft J, Braun EL, Warnow T, Jun W, Gilbert MTP, Zhang G: **Whole-genome analyses resolve early branches in the tree of life of modern birds.** *Science* 2014, **346**(6215):1320–1331.
